# Supplementary material
Source: Springer Nature journal article supplement (https://www.springermedizin.de/resource/supplementary/12890_2014_523_MOESM3_ESM.pdf/9505680)
Supplement: MOESM3 [file 9505680]

| Table 2: The baseline CF Stigma Scale scores                                               |                     |            |           |                  |
|--------------------------------------------------------------------------------------------|---------------------|------------|-----------|------------------|
|                                                                                            | Strongly Disagree=1 | Disagree=2 | Agree=3   | Strongly Agree=4 |
| N=45                                                                                       | N(%)                | N(%)       | N(%)      | N(%)             |
| 1. I am very careful who I tell that I have CF.                                            | 6 (13.3)            | 17 (37.8)  | 10 (22.2) | 11 (24.4)        |
| 3. Having CF makes me feel unclean.                                                        | 30 (66.7)           | 7 (15.6)   | 6 (13.3)  | 1 (2.2)          |
| 4. Having CF makes me feel that I'm a bad person.                                          | 37 (82.2)           | 6 (13.3)   | 1 (2.2)   | -                |
| 5. Most people think that a person with CF is disgusting.                                  | 25 (55.6)           | 13 (28.9)  | 6 (13.3)  | -                |
| 6. Most people with CF are rejected when others find out.                                  | 23 (51.1)           | 19 (42.2)  | 2 (4.4)   | -                |
| 7. I have been hurt by how people reacted to learning I have CF.                           | 22 (48.9)           | 11 (24.4)  | 2 (4.4)   | 1 (2.2)          |
| 8. I have stopped socializing with some people because of their reactions to my having CF. | 23 (51.1)           | 13 (28.9)  | 7 (15.6)  | -                |
| 10. I worry that people who know I have CF will tell others.                               | 23 (51.1)           | 15 (33.3)  | 4 (8.9)   | 2 (4.4)          |

Note: Higher agreement reflects higher stigma experienced by patient
